# Supplementary material
Source: PubMed Central journal article supplement (PMC2745986)
Supplement: NIHMS127414-supplement-Supp_Figs_01.pdf [file NIHMS127414-supplement-Supp_Figs_01.pdf]

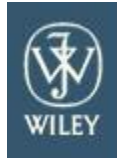

**Quantitative Analysis of Microtubule Dynamics during Adhesion-Mediated Growth Cone Guidance**

|                               |                                                                                                                 |
|-------------------------------|-----------------------------------------------------------------------------------------------------------------|
| Journal:                      | <i>Developmental Neurobiology</i>                                                                               |
| Manuscript ID:                | Neuro-00049-2008.R1                                                                                             |
| Wiley - Manuscript type:      | Research Article                                                                                                |
| Date Submitted by the Author: | n/a                                                                                                             |
| Complete List of Authors:     | Lee, Aih Cheun; Purdue University, Biological Sciences<br>Suter, Daniel; Purdue University, Biological Sciences |
| Key Words:                    | microtubule dynamics, actin dynamics, growth cone guidance, cell adhesion, fluorescent speckle microscopy       |
|                               |                                                                                                                 |

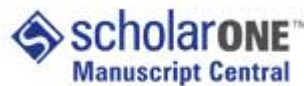

Revised Developmental Neurobiology Manuscript 00049-2008 R1

## Quantitative Analysis of Microtubule Dynamics during Adhesion-Mediated Growth Cone Guidance

Running title: Microtubule dynamics in growth cone guidance

Aih Cheun Lee and Daniel M. Suter<sup>1,\*</sup>

Department of Biological Sciences, Purdue University, 915 West State Street, West Lafayette, IN 47907-2054

<sup>1</sup>Bindley Bioscience Center, Purdue University, West Lafayette, IN 47907

\*Correspondence should be addressed to:

Dr. Daniel Suter

Department of Biological Sciences

Purdue University

915 West State Street

West Lafayette, IN 47907-2054, USA

Tel: (+) 765-496 1562

Fax: (+) 765-494 0876

E-mail: dsuter@purdue.edu

6 Figures, 4 movies, 33 pages

### Acknowledgments:

The authors thank Dr. Gil Lee and Xiong Ying for assistance with development of additional growth cone turning assays not employed in the present study. We are grateful to Dr. Peter Hollenbeck, Dr. Donald Ready and Dr. Chris Staiger as well as members of the Suter Lab for valuable comments on the manuscript. We also thank Dr. Laurie Iten for help with compression of movie files. This work was supported by grants from the NIH (R01 NS049233) and the Bindley Bioscience Center at Purdue University to D.M.S.

**Key words:** microtubule dynamics, actin dynamics, growth cone guidance, cell adhesion, fluorescent speckle microscopy

## ABSTRACT

1  
2  
3  
4  
5  
6  
7  
8  
9 During adhesion-mediated neuronal growth cone **guidance** microtubules undergo major  
10 rearrangements. However, it is unknown whether microtubules extend to adhesion sites because  
11 of changes in plus-end polymerization and/or translocation dynamics, because of changes in  
12 actin-microtubule interactions, or because they follow the reorganization of the actin  
13 cytoskeleton. Here, we used fluorescent speckle microscopy to directly quantify microtubule and  
14 actin dynamics in *Aplysia* growth cones **as they turn towards beads coated with the cell adhesion**  
15 **molecule apCAM. During the initial phase of adhesion formation, dynamic microtubules in the**  
16 **peripheral domain preferentially explore apCAM-beads** prior to changes in growth cone  
17 morphology and retrograde actin flow. Interestingly, these early microtubules have unchanged  
18 polymerization rates but spend less time in retrograde translocation due to uncoupling from actin  
19 flow. Furthermore, microtubules exploring the adhesion site spend less time in depolymerization.  
20 **During the later phase of traction force generation, the central domain advances and more**  
21 **microtubules in the peripheral domain** extend because of attenuation of actin flow and clearance  
22 of F-actin structures. Microtubules in the transition zone and central domain, however,  
23 translocate towards the adhesion site in concert with actin arcs and bundles, respectively. We  
24 conclude that adhesion molecules guide neuronal growth cones and underlying microtubule  
25 rearrangements **largely** by differentially regulating microtubule-actin coupling and actin  
26 movements according to growth cone region and not by controlling plus-end polymerization  
27 rates.  
28  
29  
30  
31  
32  
33  
34  
35  
36  
37  
38  
39  
40  
41  
42  
43  
44  
45  
46  
47  
48  
49  
50  
51  
52  
53  
54  
55  
56  
57  
58  
59  
60

**ABBREVIATIONS**

apCAM, *Aplysia* cell adhesion molecule; ASW, artificial sea water; C, central; CNS, central nervous system; DIC, differential interference contrast; FSM, fluorescent speckle microscopy; P, peripheral; restrained bead interaction (RBI); T, transition.

For Peer Review

## INTRODUCTION

Neuronal growth cones are highly specialized signaling devices at the tip of axons, integrating extracellular guidance information and transducing it into directional movement towards target cells. The two major cytoskeletal components that drive this directional locomotion are microtubules and actin filaments (Dent and Gertler, 2003; Gordon-Weeks, 2004; Kalil and Dent, 2005). It is well established that the actin cytoskeleton is critical for growth cone motility while microtubules are essential for axonal elongation (Yamada et al., 1970; Letourneau and Ressler, 1984; Marsh and Letourneau, 1984). In addition, both microtubule and actin dynamics are required for growth cone guidance (Bentley and Toroian-Raymond, 1986; Sabry et al., 1991; Chien et al., 1993; Tanaka and Kirschner, 1995; Williamson et al., 1996; Challacombe et al., 1997; Buck and Zheng, 2002; Suter et al., 2004). Growth cone steering in vivo and in vitro involves major rearrangements of both microtubules and actin filaments (Sabry et al., 1991; Lin and Forscher, 1993; O'Connor and Bentley, 1993; Tanaka and Kirschner, 1995; Tanaka and Sabry, 1995; Suter et al., 1998; Dent and Gertler, 2003; Zhou and Cohan, 2004).

Dynamic microtubules explore the growth cone peripheral (P) domain where they interact with F-actin bundles (Tanaka and Kirschner, 1991; Dent and Kalil, 2001; Schaefer et al., 2002; Zhou et al., 2002; Suter et al., 2004). The steady state distribution of these dynamic microtubules is largely determined by plus-end polymerization and retrograde translocation. Although not required for microtubule exploration of the P domain, filopodial actin bundles guide the polymerization of microtubules while removing them at the same time from the periphery by coupling to retrograde actin flow (Schaefer et al., 2002; Burnette et al., 2007). Furthermore, actin-microtubule interactions are critical for growth cone guidance and directed

1  
2  
3 axonal outgrowth (Challacombe et al., 1996; Dent and Kalil, 2001; Buck and Zheng, 2002;  
4  
5 Schaefer et al., 2002; Zhou et al., 2002; Gordon-Weeks, 2004; Suter et al., 2004; Zhou and  
6  
7 Cohan, 2004). Despite this wealth of information on the role of the growth cone cytoskeleton,  
8  
9 surprisingly little is known about which aspects of actin and microtubule polymerization and  
10  
11 translocation dynamics are affected during growth cone turning induced by specific guidance  
12  
13 cues. The *Aplysia* cell adhesion molecule (apCAM) mediates growth cone steering involving  
14  
15 leading edge protrusion and central (C) domain advance accompanied by attenuation of  
16  
17 retrograde F-actin flow, traction force generation and microtubule extension to adhesion sites  
18  
19 (Suter et al., 1998). These findings provided evidence for a mechanism of substrate-cytoskeletal  
20  
21 coupling controlling not only growth cone movements (Mitchison and Kirschner, 1988; Jay,  
22  
23 2000; Suter and Forscher, 2000) but cell migration in general (Lauffenburger and Horwitz, 1996;  
24  
25 Jurado et al., 2005; Gupton and Waterman-Storer, 2006; Giannone et al., 2007). In addition, two  
26  
27 molecular motors, myosin II and dynein, have recently been implicated in laminin-mediated  
28  
29 growth cone guidance and remodeling (Turney and Bridgman, 2005; Myers et al., 2006;  
30  
31 Grabham et al., 2007). However, it is unclear whether microtubule polymerization or  
32  
33 translocation dynamics actually change during adhesion-mediated growth cone turning, whether  
34  
35 microtubule-actin interactions are altered or whether microtubules simply follow the actin  
36  
37 reorganization.  
38  
39  
40  
41  
42  
43  
44

45  
46 To address these basic questions we combined microtubule/actin fluorescent speckle  
47  
48 microscopy (FSM) (Waterman-Storer et al., 1998) with the restrained bead interaction (RBI)  
49  
50 assay, which utilizes apCAM-coated beads to induce adhesion-mediated growth cone steering  
51  
52 (Suter et al., 1998). The combination of these two techniques enabled us to directly quantify both  
53  
54 actin and microtubule dynamics during apCAM-mediated adhesion formation and traction force  
55  
56  
57  
58  
59  
60

1  
2  
3 **generation.** Our results show that microtubules explore the adhesion site before morphological  
4  
5 changes occur and that these early microtubules extend due to uncoupling from retrograde actin  
6  
7 flow and not due to changes in plus-end polymerization dynamics. **During the second phase of**  
8  
9 **growth cone guidance when traction force builds up,** the bulk of microtubules reorient largely  
10  
11 due to changes of the actin organization.  
12  
13  
14  
15  
16  
17  
18  
19  
20  
21  
22  
23  
24  
25  
26  
27  
28  
29  
30  
31  
32  
33  
34  
35  
36  
37  
38  
39  
40  
41  
42  
43  
44  
45  
46  
47  
48  
49  
50  
51  
52  
53  
54  
55  
56  
57  
58  
59  
60

For Peer Review

## METHODS

### *Aplysia Bag Cell Neuronal Culture*

*Aplysia* bag cell neurons were dissected and cultured on poly-L-lysine-coated coverslips as previously described (Forscher and Smith, 1988; Suter et al., 1998). Cultured cells were kept in L15 medium (Invitrogen) supplemented with artificial seawater (ASW) overnight in a 14° C incubator. All procedures were performed in accordance with institutional guidelines.

### *Fluorescent Speckle Microscopy of Microtubule and F-Actin Dynamics*

We performed multimode Differential Interference Contrast (DIC)/microtubule/actin fluorescent speckle microscopy as recently described (Waterman-Storer et al., 1998; Schaefer et al., 2002). 1 mg/ml rhodamine-labeled tubulin (Cytoskeleton, Inc) and 20 μM Alexa 488-phalloidin (Molecular Probes) were prepared in injection buffer (100 mM PIPES pH 7.0, 1 mM MgCl<sub>2</sub>, 1 mM EGTA) and clarified at 10,000xg for 30 minutes at 4° C before microinjection into the cell bodies of 1 day old *Aplysia* bag cell neurons using an NP-2 micromanipulator and Femtojet microinjection system (Eppendorf). Cells were allowed to recover for at least 1 hour before L15-ASW was exchanged with imaging medium (ASW supplemented with 2 mg/ml BSA, 1 mg/ml L-carnosine and 25 mM vitamin E; all chemicals from Sigma-Aldrich or Calbiochem). Triple channel DIC/microtubule/actin timelapse sequences were taken at 10 seconds intervals using an Eclipse TE2000E (Nikon) microscope equipped with a 60x 1.4 NA oil objective and a EMCCD camera (Cascade II, Photometrics) controlled with MetaMorph 7.0 software (Molecular Devices). Fluorescent epi-illumination was provided by an X-cite 120 metal



1  
2  
3 halide lamp (EXFO Photonic Solutions, Inc) and appropriate single band pass filter sets  
4  
5  
6 (Chroma).  
7  
8  
9  
10

### 11 **Restrained Bead Interaction Assay**

14 RBI assays were performed as previously reported (Suter et al., 1998; Suter et al., 2004).  
15  
16 5  $\mu\text{m}$ -diameter Ni-NTA silica beads (Micromod) were coated with recombinant 6His-tagged  
17  
18 apCAM purified from baculovirus-infected Sf9 cells (Suter et al., 2004). apCAM-coated beads  
19  
20 were prepared as a 1:5000 dilution from 1% stocks in imaging medium. Cells were perfused with  
21  
22 imaging medium throughout the experiment. We used a 3D-hydraulic micromanipulator  
23  
24 (Narishige) to move individual beads with a microneedle onto the center quadrants Q2 or Q3 of  
25  
26 the growth cone P domain and prevent them from retrograde movement. Because of the regional  
27  
28 difference in microtubule distribution [Fig. 1], beads were consistently placed on the center  
29  
30 quadrants in order to assess microtubule and actin dynamics. Triple channel time-lapse recording  
31  
32 was performed before and immediately after bead placement until the C domain boundary  
33  
34 reached the bead site, as determined by DIC imaging.  
35  
36  
37  
38  
39  
40  
41  
42  
43

### 44 **Image processing and analysis of cytoskeletal dynamics**

45  
46 MetaMorph 7.0 software (Molecular Devices) was used for image processing,  
47  
48 quantitative analysis of microtubule and actin dynamics and making of movies and montages. To  
49  
50 enhance speckles, microtubule and actin images were processed with spatial filters in the  
51  
52 following sequence: (1) Low pass 4 x 4; (2) Laplace 2 edge enhancement; (3) Low pass 3 x 3.  
53  
54 For measuring microtubule density past 75% line, 10 minutes time-lapse stacks (60 images) were  
55  
56  
57  
58  
59  
60

1  
2  
3 processed, binarized, and summed per segment. The C domain-bead axis was defined as the 5  
4  
5  $\mu\text{m}$  wide corridor between the bead position and the C domain boundary. Using individual  
6  
7 microtubule montages, polymerization and depolymerization rates were measured as the length  
8  
9 change between the first speckle at the plus-end and an internal microtubule fiduciary mark over  
10  
11 time, while translocation was defined by position changes of an internal speckle (Schaefer et al.,  
12  
13 2002). For analysis of microtubule polymerization and translocation dynamics, we only selected  
14  
15 clearly identifiable single microtubules in the P domain. Rates were determined on a time-  
16  
17 weighted basis. Retrograde F-actin flow rates were assessed by kymograph analysis of actin  
18  
19 speckles. One tailed paired t-tests were performed to identify significant changes in dynamics  
20  
21 parameters between side vs. center, on- vs. off-axis, and pre-bead vs. latency microtubules.  
22  
23 Photoshop CS3 (Adobe) and Canvas 8 (Deneba) were used for image processing and final figure  
24  
25 assembly.  
26  
27  
28  
29  
30  
31  
32  
33  
34  
35  
36  
37  
38  
39  
40  
41  
42  
43  
44  
45  
46  
47  
48  
49  
50  
51  
52  
53  
54  
55  
56  
57  
58  
59  
60

## RESULTS

### **Dynamic Microtubules Preferentially Explore the Growth Cone Periphery on the Side**

Before analyzing microtubule dynamics during adhesion-mediated growth cone guidance, we first wondered whether there are regional differences in microtubule dynamics along the periphery in steady state *Aplysia* growth cones on poly-lysine substrates [Fig. 1]. Such information is critical for the proper analysis and interpretation of changes in microtubule behavior during growth cone responses to more specific adhesion substrates such as apCAM. In agreement with our previous study (Suter et al., 2004), we found that in steady state growth cones, dynamic microtubules explore the distal P domain 67% more frequently in the side than in the center segments [Fig. 1(B,D); Movie 1]. Since microtubules are often associated with retrogradely moving filopodial actin bundles in the P domain (Schaefer et al., 2002), a slower actin flow in the side sections would result in less “clearing” of microtubules from the growth cone periphery. However, here we did not measure any significant differences in actin flow rates along the growth cone periphery [Fig. 1(C,E); average actin flow rate  $4.7 \pm 0.2$   $\mu\text{m}/\text{minute}$ ] and therefore propose that the increased density of microtubules in distal side areas is not due to a similar decrease in retrograde F-actin flow rates.

Next, we analyzed microtubule plus-end polymerization and translocation dynamics in side versus center quadrants by FSM [Fig. 1(F-I)]. Polymerization rates were not significantly different between side ( $7.8 \pm 0.4$   $\mu\text{m}/\text{minute}$ ) and center region microtubules ( $8.4 \pm 0.4$   $\mu\text{m}/\text{minute}$ ), and similar observations were made for depolymerization rates [Fig. 1(F)]. In addition, forward ( $4.5 \pm 0.4/4.2 \pm 0.3$   $\mu\text{m}/\text{minute}$ ) and retrograde ( $4.7 \pm 0.2/5.2 \pm 0.2$   $\mu\text{m}/\text{minute}$ ) translocation rates did not differ between microtubules in side versus center regions versus, respectively [Fig. 1(G)].

1  
2  
3 Retrograde translocation rates of microtubules were similar to retrograde **actin** flow rates. This is  
4 suggestive of actin-microtubule coupling, which occurs 65% of time between microtubules and  
5 actin bundles in the growth cone periphery (Schaefer et al., 2002). Furthermore, the percentage  
6 of time **microtubules** spent in polymerization or depolymerization had no regional variations [Fig.  
7  
8  
9  
10  
11  
12  
13  
14  
15  
16  
17  
18  
19  
20  
21  
22  
23  
24  
25  
26  
27  
28  
29  
30  
31  
32  
33  
34  
35  
36  
37  
38  
39  
40  
41  
42  
43  
44  
45  
46  
47  
48  
49  
50  
51  
52  
53  
54  
55  
56  
57  
58  
59  
60  
1(H)].

The only significant difference between side and center microtubules were the fractions of time spent in retrograde translocation and pauses [Fig. 1(I)]. Center microtubules spent 71±3% of the observed time in retrograde translocation compared to 46±3% for side microtubules. Conversely, center microtubules spent less time (18±2%) in translocation pauses than side microtubules (40±3%). Thus, dynamic exploratory microtubules were more abundant in distal side regions because they spent less time spent in retrograde translocation, most likely due to uncoupling from actin flow.

### **Microtubules Explore Adhesion Sites during the Latency Phase**

Next we analyzed microtubule dynamics during adhesion-mediated growth cone steering. In the restrained bead interaction (RBI) assay, microbeads coated with ligands for the *Aplysia* cell adhesion molecule (apCAM) are positioned onto the distal P domain of growth cones to mimic cellular adhesive substrates (Suter et al., 1998). The retrograde movement of beads coupled via apCAM to the underlying actin flow is prevented by a microneedle, resulting in a stereotypic growth cone response towards the bead that can be subdivided into two major phases.

(1) The “*latency*” phase begins with bead placement and involves adhesion formation and signaling but very little morphological changes. (2) The following “*traction*” phase (previously

1  
2  
3  
4  
5  
6  
7  
8  
9  
10  
11  
12  
13  
14  
15  
16  
17  
18  
19  
20  
21  
22  
23  
24  
25  
26  
27  
28  
29  
30  
31  
32  
33  
34  
35  
36  
37  
38  
39  
40  
41  
42  
43  
44  
45  
46  
47  
48  
49  
50  
51  
52  
53  
54  
55  
56  
57  
58  
59  
60

named “interaction” phase (Suter et al., 1998)) is characterized by major structural, cytoskeletal and biophysical changes. These changes include central domain extension towards the bead and protrusive growth of the leading edge in front of the bead. Actin flow is significantly attenuated along the C domain-bead axis and microtubules extend towards the adhesion site while tension builds up between the C domain and the bead substrate [Fig. 2(A-D); Movie 2] (Suter et al., 1998). These morphological and cytoskeletal rearrangements faithfully recapitulate the events occurring during growth cone encounters with favorable cellular substrates (Lin and Forscher, 1993) and correspond to the stages in axon formation (Goldberg and Burmeister, 1986; Dent and Gertler, 2003).

During the latency period we previously observed F-actin accumulation and Src activation around the bead adhesion site, both depend on dynamic microtubules (Suter et al., 2004). Since microtubules strengthen apCAM-actin coupling by Src activation, we speculated that dynamic microtubules could preferentially explore the adhesion site during the latency phase. Indeed, here we show by live cell imaging that microtubule density in the distal P domain along the C domain-bead axis (on-axis) but not in neighboring areas (off-axis) increased up to 9-fold throughout the latency period, whereas overall growth cone morphology remained stable [Fig. 2(D,E); Movie 3]. Thus, preferential microtubule extension to the adhesion site occurred clearly before the C domain (characterized by large organelles) moved towards the bead. Microtubule density then further doubled between the late latency and the traction period [Fig. 2(E)].

Since microtubule distribution in the P domain is affected by the actin cytoskeleton (Forscher and Smith, 1988; Burnette et al., 2007), we analyzed whether changes in F-actin dynamics or content could explain the preferential microtubule exploration of the apCAM adhesion site during the latency phase. Consistent with our measurements of F-actin flow rates

1  
2  
3 using marker beads (Suter et al., 1998), actin FSM revealed that during the complete latency  
4 period retrograde F-actin flow **along the C domain-bead** axis ( $5.1 \pm 0.3$   $\mu\text{m}/\text{minute}$  in late latency)  
5 was not different from either the period before bead placement ( $4.9 \pm 0.3$   $\mu\text{m}/\text{minute}$ ) or off-axis  
6 areas ( $5.1 \pm 0.3$   $\mu\text{m}/\text{minute}$ ) [Fig. 2(F,G)]. In addition, we did not observe any decrease in F-actin  
7 content **between the C domain boundary and the bead area** during the latency period. **During the**  
8 **traction phase however**, we observed an 80% attenuation of retrograde flow as well as a decrease  
9 in F-actin content specifically **along the C domain-bead axis** (dark area below line 5 and white  
10 arrows in Figure 2(G)). Furthermore, montages of on-axis F-actin dynamics revealed brief  
11 periods of forward movements of actin structures at the end of the **traction phase** (arrows in  
12 Figure 2(G)). Upon bead release, flow rates were increased when compared to pre-bead control  
13 rates [Fig. 2(G), line 6:  $12.7$   $\mu\text{m}/\text{minute}$ ], indicating that the beads were under strong tension  
14 **during the traction phase. In summary, microtubules along the C domain-bead axis preferentially**  
15 **explored apCAM adhesion sites during the early phase of apCAM-cytoskeletal coupling even**  
16 **though F-actin flow continued at similar rate.**

### **Exploratory Microtubules Spend less Time Coupled to Actin Flow and in Depolymerization**

17  
18  
19  
20  
21  
22  
23  
24  
25  
26  
27  
28  
29  
30  
31  
32  
33  
34  
35  
36  
37  
38  
39  
40  
41  
42  
43 To determine the mechanisms by which microtubules explore the adhesion site during the  
44 latency period, we analyzed **and compared** plus-end polymerization and translocation dynamics  
45 of individual microtubules located on and off the **C domain-bead** axis before (“pre-bead”) and  
46 right after bead placement (“latency”) on the same growth cones. Before bead placement on-axis  
47 microtubules were often observed in polymerization phase while undergoing retrograde  
48 translocation [Fig. 3(A)]. During the latency phase, however, these on-axis microtubules spent  
49 less time in depolymerization and retrograde translocation [Fig. 3(B)]. Quantification of plus-end  
50  
51  
52  
53  
54  
55  
56  
57  
58  
59  
60

1  
2  
3  
4  
5  
6  
7  
8  
9  
10  
11  
12  
13  
14  
15  
16  
17  
18  
19  
20  
21  
22  
23  
24  
25  
26  
27  
28  
29  
30  
31  
32  
33  
34  
35  
36  
37  
38  
39  
40  
41  
42  
43  
44  
45  
46  
47  
48  
49  
50  
51  
52  
53  
54  
55  
56  
57  
58  
59  
60

polymerization and translocation dynamics in 10 growth cones is presented in Figure 4. During the latency period, polymerization ( $6.9\pm 0.6$   $\mu\text{m}/\text{minute}$ ) and depolymerization rates ( $9.2\pm 1.1$   $\mu\text{m}/\text{minute}$ ) of on-axis microtubules did not differ significantly from control values measured in the same region before bead placement ( $7.7\pm 0.4$  and  $10.4\pm 1.3$   $\mu\text{m}/\text{minute}$ , respectively) or from off-axis control microtubules [Fig. 4(B)]. Retrograde and forward translocation rates of microtubules exploring the adhesion site during the latency also remained similar to pre-bead control values as well as to rates of off-axis microtubules before and after bead placement on the same growth cones [Fig. 4(C)].

Notably, these exploratory microtubules spent significantly less time in retrograde translocation during the latency period when compared to pre-bead control microtubules ( $53\pm 7.5\%$  versus  $74\pm 2.1\%$ ), while spending more time in translocation pauses ( $31\pm 3.2\%$  versus  $16\pm 1.8\%$ ; Fig. 4(E)). In addition, these on-axis microtubules also spent less time in depolymerization during the latency period than before bead placement ( $7\pm 1.2\%$  versus  $18\pm 3.0\%$ ), but more time in polymerization pauses ( $41\pm 4.0\%$  versus  $31\pm 4.4\%$ ; Fig. 4(D)). Neither polymerization nor translocation dynamics of off-axis microtubules were affected during any phase of the apCAM-mediated growth cone **guidance**. Thus, microtubules preferentially explore apCAM adhesion sites during the latency phase through two mechanisms: (1) because they undergo less retrograde translocation due to partial uncoupling from actin flow and (2) because they spend less time in depolymerization.

### **Microtubule Extension during the **Traction** Phase in Response to F-actin Rearrangements**

We next investigated the mechanism of bulk microtubule extension towards the adhesion site during the **traction phase of apCAM-mediated growth cone guidance**. We have previously

1  
2  
3 shown that **apCAM-actin coupling** results in an acute reduction of retrograde actin flow at the  
4 onset of the **traction phase** (Suter et al., 1998; Suter and Forscher, 2001). Here, we confirmed  
5 these flow effects using actin FSM [Figs. 2(G) and 5(A) upper panel, orange and pink speckles].  
6  
7 During the **traction** phase, retrograde actin flow rates between the bead and the C domain were  
8 reduced by 80% compared to before bead placement (n=7). In addition, we observed a gradual  
9 clearance of actin bundles from the on-axis corridor during the **traction** period when compared to  
10 the latency or pre-bead period [Fig. 2(G), dark area below white arrows; Fig. 5(A)]. Finally, the  
11 transition (T) zone, in which actin bundles are severed and disassembled, moved forward during  
12 the **traction** period (indicated by red line in Fig. 5(A)). F-actin flow attenuation and bundle  
13 clearance in the P domain were accompanied by **bulk extension of microtubules towards the bead**  
14 [Fig. 5(A) lower panel, red microtubules], while exploratory microtubules from the latency phase  
15 persisted around the bead [Fig. 5(A), blue and green microtubules]. Observation of time-lapse  
16 movies indicated that the polymerization dynamics of these **on-axis** microtubules **during the**  
17 **traction period** did not significantly differ from the pre-bead or latency period, while most  
18 microtubules were either in translocation pauses or still in retrograde translocation, and very little  
19 forward translocation was observed (Movies 2 and 4; Fig. 5(A) lower panel).

20  
21 In addition, microtubules in the T zone and C domain were re-oriented in concert with  
22 adjacent actin structures towards the apCAM-bead [Fig. 5(B); Movie 4]. These structures include  
23 the transverse actin arcs in the T zone as well as actin bundles in the C domain, both of which  
24 undergo Rho-dependent actomyosin-contractility (Schaefer et al., 2002; Zhang et al., 2003). Arcs  
25 are oriented perpendicular to the filopodial actin bundles (Movie 4, orange and yellow  
26 arrowhead; Fig. 6), while central actin bundles are oriented parallel to the axis of growth (Movie  
27 4, red and pink arrowhead) and appear to be formed from T zone arcs (Zhang et al., 2003). The  
28  
29  
30  
31  
32  
33  
34  
35  
36  
37  
38  
39  
40  
41  
42  
43  
44  
45  
46  
47  
48  
49  
50  
51  
52  
53  
54  
55  
56  
57  
58  
59  
60



1  
2  
3  
4 kymographs in Figure 5(B) show concomitant movements of actin speckles on arcs and C  
5  
6 domain bundles together with microtubule speckles towards the C domain and the apCAM-bead.  
7  
8 These movements were confirmed by tracking centroid positions of adjacent actin and  
9  
10 microtubule speckles [Fig. 5(C)]. During the **traction** period the decrease of P domain actin  
11  
12 structures behind the bead resulted in reorientation of actin arcs towards the adhesion site where  
13  
14 they appeared to be immobilized. Because they are under actomyosin-based tension, actin arcs  
15  
16 narrowed the C domain and focused the microtubules towards the bead site (Movie 4). Bulk  
17  
18 microtubules and actin bundles in the C domain both translocated forward towards the apCAM-  
19  
20 bead at an average rate of  $2.69 \pm 0.05 \mu\text{m}/\text{minute}$  (n=6), which is similar to the rate of forward  
21  
22 movement of the C domain boundary and leading edge ( $2.74 \pm 0.56 \mu\text{m}/\text{minute}$ , n=14). In  
23  
24  
25  
26  
27 summary, during the **traction** period, P domain microtubules advanced towards the adhesion site  
28  
29 because of actin flow attenuation and actin clearance, while T zone and C domain microtubules  
30  
31 **translocated forward** most likely through association with arcs and central actin bundles,  
32  
33  
34 respectively.  
35  
36  
37  
38  
39  
40  
41  
42  
43  
44  
45  
46  
47  
48  
49  
50  
51  
52  
53  
54  
55  
56  
57  
58  
59  
60

## DISCUSSION

There is accumulating evidence that actin-microtubule interactions are critical for a number of cellular processes, including cell migration, growth cone pathfinding, cell division and cortical flow (Rodriguez et al., 2003). In neuronal growth cones, actin-microtubule interactions regulate microtubule distribution under steady state condition and are important for growth cone steering and directed axonal outgrowth (Challacombe et al., 1996; Dent and Kalil, 2001; Buck and Zheng, 2002; Schaefer et al., 2002; Zhou et al., 2002; Gordon-Weeks, 2004; Suter et al., 2004; Zhou and Cohan, 2004). However, these previous studies have largely relied on immunocytochemical data and cytoskeletal drug treatments but not quantitative live cell imaging. Thus, **it has remained unknown** (1) whether microtubule polymerization or translocation dynamics change during growth cone steering, (2) whether actin-microtubule coupling changes or (3) whether microtubules simply follow actin rearrangements. A detailed knowledge of which aspect of cytoskeletal dynamics is affected in growth cone turning is essential in order to understand the underlying molecular mechanisms and guide the search for cytoskeletal effector proteins downstream of guidance receptors. **To our knowledge the present study represents the first quantitative analysis of microtubules dynamics during adhesion-mediated cytoskeletal rearrangements involved in growth cone steering.** Here, we have demonstrated by quantitative microtubule/actin FSM that microtubule extension in adhesion-mediated attractive growth cone **guidance** is largely regulated at the level of actin-microtubule coupling and less by controlling microtubule plus end polymerization dynamics. While our findings, as well as others, indicate that guidance cues primarily affect the actin cytoskeleton and actin-microtubule interactions (Dent and Gertler, 2003; Zhou and Cohan, 2004), certain cues

1  
2  
3 such as NGF and slit may also signal directly to microtubule plus-end binding proteins such as  
4  
5 APC and orbit/MAST/CLASP, respectively, and affect microtubule dynamics independently of  
6  
7 the actin cytoskeleton (Lee et al., 2004; Zhou et al., 2004).  
8  
9

### 10 11 12 13 14 **Microtubule Dynamics in Steady State Growth Cones** 15

16  
17 Consistent with our previous report (Suter et al., 2004), we found that steady state growth  
18  
19 cones **on poly-lysine substrates** have a higher density of exploratory microtubules in the side  
20  
21 versus center regions [Fig. 1]. The present finding of constant actin flow rates along the growth  
22  
23 cone periphery is in slight contrast with our previous study, where we reported a 15% decrease in  
24  
25 actin flow in the side versus center regions (Suter et al., 2004). Because of the larger sample size  
26  
27 in the present study, we believe that the current finding is more accurate. In addition, a relatively  
28  
29 small decrease of 15% in actin flow could not solely explain the 67% increase in microtubule  
30  
31 density on the side. Thus, other mechanisms must cause the region-specific microtubule  
32  
33 exploration of the distal P domain. We found that microtubules in the side segments spend  
34  
35 significantly less time in retrograde translocation than microtubules in the center segments. Since  
36  
37 retrograde microtubule translocation is largely caused by coupling to retrogradely moving actin  
38  
39 bundles (Schaefer et al., 2002), we conclude that microtubules on the growth cone sides have a  
40  
41 lower level of actin coupling than center region microtubules. Such differences in actin coupling  
42  
43 could be due to alterations in amounts or affinities of actin-microtubule linker proteins between  
44  
45 side and center regions. Although putative linker molecules such as microtubule associated and  
46  
47 motor proteins have been proposed, clearly more work is needed to establish the role of these  
48  
49 candidate proteins in neuronal growth cones (Rodriguez et al., 2003).  
50  
51  
52  
53  
54  
55  
56  
57  
58  
59  
60

1  
2  
3  
4  
5  
6  
7  
8  
9  
10  
11  
12  
13  
14  
15  
16  
17  
18  
19  
20  
21  
22  
23  
24  
25  
26  
27  
28  
29  
30  
31  
32  
33  
34  
35  
36  
37  
38  
39  
40  
41  
42  
43  
44  
45  
46  
47  
48  
49  
50  
51  
52  
53  
54  
55  
56  
57  
58  
59  
60

What could be the functional significance of these regional differences in microtubule distribution? Since evidence suggests that microtubules have a signaling role in growth cone steering (Buck and Zheng, 2002; Suter et al., 2004), we speculate that the higher density of microtubules in the side regions could increase the sensing potential of the growth cone for guidance cues that are presented more “off-path” with respect to the direction of growth. **At least in the case of the large *Aplysia* growth cone with a wide and not very dynamic P domain, the probability of adhesion receptor binding and activation on the side could be lower than in the center region while the growth cone is moving straight ahead in cell culture. Because of the *Aplysia* growth cone geometry, adhesion molecules presented in the path of growth cone movement will engage a higher number of receptors in the center part of the P domain when compared to adhesion molecules presented at similar densities on the side. The growth cone might compensate the lower probability of encountering molecular cues on the side with an increased microtubule density which in turn could increase the probability of turning responses. Whether such a mechanism plays a role for growth cone guidance in vivo, where growth cones tend to be smaller, more dynamic and exposed to multiple cues, is unknown.**

#### **Microtubule Dynamics during Adhesion-Mediated Growth Cone Guidance**

Interestingly, we also found evidence that uncoupling from retrograde actin flow is a major cause for the gradual increase in microtubule density at adhesion sites during the latency period of **apCAM-mediated growth cone guidance**. This finding might be in contrast with our previous observations of low microtubule density at the bead based on tubulin immunocytochemistry of growth cones fixed during the latency period (Suter et al., 2004). Immunocytochemistry only provides a snapshot in time while microtubule FSM allows

1  
2  
3 monitoring the behavior of microtubules during the complete **sequence of apCAM-induced**  
4 **growth cone responses**. Thus, immunocytochemistry likely underestimates actual microtubule  
5  
6 dynamics. In addition, quantification of microtubule density was performed differently in the two  
7  
8 studies: Previously, we determined the average number of microtubules at the bead site and did  
9  
10 not directly compare these values with microtubule density at same location before bead  
11  
12 placement or off-axis. Here, we determined microtubule density by summation of binarized  
13  
14 microtubule intensities in more growth cones over 10 minutes and directly compared these  
15  
16 values with microtubule densities before bead placement and off-axis. Thus, we believe that the  
17  
18 present study describes the microtubule behavior during the latency period more accurately.  
19  
20  
21  
22  
23

24  
25 A refined substrate-cytoskeletal model (**Mitchison and Kirschner, 1988; Jay, 2000; Suter**  
26 **and Forscher, 2000**) explaining the underlying cytoskeletal changes involved in adhesion-  
27  
28 mediated growth cone **guidance** is depicted in Figure 6. Similarly to our **present** findings,  
29  
30 previous studies reported early microtubule rearrangements before growth cones turn away from  
31  
32 a repelling substrate border (Tanaka and Kirschner, 1995; Williamson et al., 1996; Challacombe  
33  
34 et al., 1997). **We hypothesize that** a signal originating from the adhesion site traveling  
35  
36 retrogradely with actin flow may reduce the coupling state of putative actin-microtubule linker  
37  
38 protein(s) such as MAP2, tau, or Short Stop (Rodriguez et al., 2003). Our data also support two  
39  
40 other potential mechanisms leading to increased microtubule density at adhesion sites during the  
41  
42 early phase of **adhesion-mediated growth cone rearrangements**. (1) One mechanism could  
43  
44 involve stabilization by plus-end tracking proteins, since microtubules also spent less time in  
45  
46 depolymerization during the latency period (Gordon-Weeks, 2004; Kalil and Dent, 2005;  
47  
48 Koester et al., 2007). Conventionally, measures of microtubule stability are usually the classic  
49  
50 parameters catastrophe and rescue frequencies, which are the frequencies of  
51  
52  
53  
54  
55  
56  
57  
58  
59  
60

1  
2  
3 polymerization/depolymerization transition events (Walker et al., 1988). In this study we have  
4  
5 not used these parameters to describe microtubule stability, because microtubules in the growth  
6  
7 cone periphery frequently collapse into the crowded central domain, after which it is difficult to  
8  
9 determine whether the same microtubules underwent rescue or not, resulting in an underestimate  
10  
11 of rescue events (Tanaka and Kirschner, 1991). Instead we used the straightforward  
12  
13 measurement of “percentage time spent” in a given polymerization behavior category, which is  
14  
15 partially reflective of catastrophe and rescue frequencies. (2) The second alternative mechanism  
16  
17 could be explained by the capture of microtubules at the adhesion site, as shown previously for  
18  
19 non-neuronal cells (Kaverina et al., 1998; Gundersen, 2002), since we observed an increase in  
20  
21 translocation pause of exploratory microtubules during the latency period.  
22  
23  
24  
25  
26

27  
28 What is the purpose of attracting early microtubules towards **the newly formed adhesion**  
29  
30 **site?** Src-tyrosine kinase activation at the bead site is essential for strong apCAM-actin coupling  
31  
32 and depends on microtubule dynamics (Suter and Forscher, 2001; Suter et al., 2004). Thus, a  
33  
34 bidirectional signal might initiate cytoskeletal reorganization in apCAM-induced growth cone  
35  
36 steering. Upon apCAM-clustering near the leading edge, signals could travel with retrograde  
37  
38 actin flow to promote microtubule extension via **partial** actin-microtubule uncoupling and  
39  
40 microtubule stabilization [Fig. 6]. These early microtubules could then deliver signaling  
41  
42 molecules such as Src activators **to strengthen** apCAM-actin coupling. As a consequence, actin  
43  
44 flow is attenuated and actin bundles disappear, allowing bulk microtubule **extension to the**  
45  
46 **adhesion site**. Similar P domain invasion by microtubules occurred when such actin changes  
47  
48 were induced globally either by application of the myosin II inhibitor blebbistatin or the actin  
49  
50 polymerization inhibitor cytochalasin B (Fischer and Smith, 1988; Burnette et al., 2007).  
51  
52  
53  
54  
55  
56  
57  
58  
59  
60

1  
2  
3  
4  
5  
6  
7  
8  
9  
10  
11  
12  
13  
14  
15  
16  
17  
18  
19  
20  
21  
22  
23  
24  
25  
26  
27  
28  
29  
30  
31  
The concerted movement of T zone and C domain microtubules and adjacent actin structures suggests that microtubules are translocated towards the adhesion site by coupling to reorienting actin arcs and central actin bundles, respectively. The T zone actin arcs and C domain actin bundles are likely the cytoskeletal structures that maintain the tension built up during **adhesion-mediated neurite growth and guidance** (Lamoureux et al., 1989; Suter et al., 1998). However, we can not precisely determine whether the coupling level between microtubules and F-actin changes during the **phase of traction force generation** because of the high density of these cytoskeletal structures in the C domain. Alternatively, the microtubule motor dynein could be involved, as proposed in laminin-stimulated growth cone turning and outgrowth (Myers et al., 2006; Grabham et al., 2007). Finally, we can not formally exclude the possibility that microtubule-microtubule interactions also **contribute to microtubule reorientation in the T zone and C domain during the traction phase.**

32  
33  
34  
35  
36  
37  
38  
39  
40  
41  
42  
43  
44  
45  
46  
47  
48  
49  
50  
51  
52  
53  
54  
55  
56  
57  
58  
59  
60  
In summary, dynamic microtubules in the P domain of growth cones advance to apCAM adhesion sites earlier than previously anticipated. Interestingly, these microtubules do so by uncoupling from actin, while bulk microtubule extension later occurs due to actin rearrangements **involved in growth cone guidance. Since actin-microtubule interactions play a role in cell migration in general (Waterman-Storer and Salmon, 1997; Salmon et al., 2002; Rodriguez et al., 2003), it will be interesting to investigate whether similar changes in actin-microtubule coupling occur when fibroblast-like cells migrate on different adhesion substrates.** These mechanistic findings will facilitate the search for the regulatory molecules in charge such as actin-microtubule linker protein(s), which is an exciting goal for future studies.

## REFERENCES

- Bentley D, Toroian-Raymond A. 1986. Disoriented pathfinding by pioneer neurone growth cones deprived of filopodia by cytochalasin treatment. *Nature* 323:712-715.
- Buck KB, Zheng JQ. 2002. Growth cone turning induced by direct local modification of microtubule dynamics. *J Neurosci* 22:9358-9367.
- Burnette DT, Schaefer AW, Ji L, Danuser G, Forscher P. 2007. Filopodial actin bundles are not necessary for microtubule advance into the peripheral domain of *Aplysia* neuronal growth cones. *Nat Cell Biol* 9:1360-1369.
- Challacombe JF, Snow DM, Letourneau PC. 1996. Actin filament bundles are required for microtubule reorientation during growth cone turning to avoid an inhibitory guidance cue. *J Cell Sci* 109 ( Pt 8):2031-2040.
- Challacombe JF, Snow DM, Letourneau PC. 1997. Dynamic microtubule ends are required for growth cone turning to avoid an inhibitory guidance cue. *J Neurosci* 17:3085-3095.
- Chien CB, Rosenthal DE, Harris WA, Holt CE. 1993. Navigational errors made by growth cones without filopodia in the embryonic *Xenopus* brain. *Neuron* 11:237-251.
- Dent EW, Gertler FB. 2003. Cytoskeletal dynamics and transport in growth cone motility and axon guidance. *Neuron* 40:209-227.
- Dent EW, Kalil K. 2001. Axon branching requires interactions between dynamic microtubules and actin filaments. *J Neurosci* 21:9757-9769.
- Forscher P, Smith SJ. 1988. Actions of cytochalasins on the organization of actin filaments and microtubules in a neuronal growth cone. *J Cell Biol* 107:1505-1516.
- Giannone G, Dubin-Thaler BJ, Rossier O, Cai Y, Chaga O, Jiang G, Beaver W, Dobereiner HG, Freund Y, Borisy G, Sheetz MP. 2007. Lamellipodial actin mechanically links myosin activity with adhesion-site formation. *Cell* 128:561-575.
- Goldberg DJ, Burmeister DW. 1986. Stages in axon formation: observations of growth of *Aplysia* axons in culture using video-enhanced contrast-differential interference contrast microscopy. *J Cell Biol* 103:1921-1931.
- Gordon-Weeks PR. 2004. Microtubules and growth cone function. *J Neurobiol* 58:70-83.
- Grabham PW, Seale GE, Bennecib M, Goldberg DJ, Vallee RB. 2007. Cytoplasmic dynein and LIS1 are required for microtubule advance during growth cone remodeling and fast axonal outgrowth. *J Neurosci* 27:5823-5834.
- Gundersen GG. 2002. Evolutionary conservation of microtubule-capture mechanisms. *Nat Rev Mol Cell Biol* 3:296-304.
- Gupton SL, Waterman-Storer CM. 2006. Spatiotemporal feedback between actomyosin and focal-adhesion systems optimizes rapid cell migration. *Cell* 125:1361-1374.
- Jay DG. 2000. The clutch hypothesis revisited: ascribing the roles of actin-associated proteins in filopodial protrusion in the nerve growth cone. *J Neurobiol* 44:114-125.



- 1  
2  
3  
4  
5  
6  
7  
8  
9  
10  
11  
12  
13  
14  
15  
16  
17  
18  
19  
20  
21  
22  
23  
24  
25  
26  
27  
28  
29  
30  
31  
32  
33  
34  
35  
36  
37  
38  
39  
40  
41  
42  
43  
44  
45  
46  
47  
48  
49  
50  
51  
52  
53  
54  
55  
56  
57  
58  
59  
60
- Jurado C, Haserick JR, Lee J. 2005. Slipping or gripping? Fluorescent speckle microscopy in fish keratocytes reveals two different mechanisms for generating a retrograde flow of actin. *Mol Biol Cell* 16:507-518.
- Kalil K, Dent EW. 2005. Touch and go: guidance cues signal to the growth cone cytoskeleton. *Curr Opin Neurobiol* 15:521-526.
- Kaverina I, Rottner K, Small JV. 1998. Targeting, capture, and stabilization of microtubules at early focal adhesions. *J Cell Biol* 142:181-190.
- Koester MP, Muller O, Pollerberg GE. 2007. Adenomatous polyposis coli is differentially distributed in growth cones and modulates their steering. *J Neurosci* 27:12590-12600.
- Lamoureux P, Buxbaum RE, Heidemann SR. 1989. Direct evidence that growth cones pull. *Nature* 340:159-162.
- Lauffenburger DA, Horwitz AF. 1996. Cell migration: a physically integrated molecular process. *Cell* 84:359-369.
- Lee H, Engel U, Rusch J, Scherrer S, Sheard K, Van Vactor D. 2004. The microtubule plus end tracking protein Orbit/MAST/CLASP acts downstream of the tyrosine kinase Abl in mediating axon guidance. *Neuron* 42:913-926.
- Letourneau PC, Ressler AH. 1984. Inhibition of neurite initiation and growth by taxol. *J Cell Biol* 98:1355-1362.
- Lin CH, Forscher P. 1993. Cytoskeletal remodeling during growth cone-target interactions. *J Cell Biol* 121:1369-1383.
- Marsh L, Letourneau PC. 1984. Growth of neurites without filopodial or lamellipodial activity in the presence of cytochalasin B. *J Cell Biol* 99:2041-2047.
- Mitchison T, Kirschner M. 1988. Cytoskeletal dynamics and nerve growth. *Neuron* 1:761-772.
- Myers KA, Tint I, Nadar CV, He Y, Black MM, Baas PW. 2006. Antagonistic forces generated by cytoplasmic dynein and myosin-II during growth cone turning and axonal retraction. *Traffic* 7:1333-1351.
- O'Connor TP, Bentley D. 1993. Accumulation of actin in subsets of pioneer growth cone filopodia in response to neural and epithelial guidance cues in situ. *J Cell Biol* 123:935-948.
- Rodriguez OC, Schaefer AW, Mandato CA, Forscher P, Bement WM, Waterman-Storer CM. 2003. Conserved microtubule-actin interactions in cell movement and morphogenesis. *Nat Cell Biol* 5:599-609.
- Sabry JH, O'Connor TP, Evans L, Toroian-Raymond A, Kirschner M, Bentley D. 1991. Microtubule behavior during guidance of pioneer neuron growth cones in situ. *J Cell Biol* 115:381-395.
- Salmon WC, Adams MC, Waterman-Storer CM. 2002. Dual-wavelength fluorescent speckle microscopy reveals coupling of microtubule and actin movements in migrating cells. *J Cell Biol* 158:31-37.

- 1  
2  
3 Schaefer AW, Kabir N, Forscher P. 2002. Filopodia and actin arcs guide the assembly and  
4 transport of two populations of microtubules with unique dynamic parameters in neuronal  
5 growth cones. *J Cell Biol* 158:139-152.  
6  
7 Suter DM, Errante LD, Belotserkovsky V, Forscher P. 1998. The Ig superfamily cell adhesion  
8 molecule, apCAM, mediates growth cone steering by substrate-cytoskeletal coupling. *J*  
9 *Cell Biol* 141:227-240.  
10  
11 Suter DM, Forscher P. 2000. Substrate-cytoskeletal coupling as a mechanism for the regulation  
12 of growth cone motility and guidance. *J Neurobiol* 44:97-113.  
13  
14 Suter DM, Forscher P. 2001. Transmission of growth cone traction force through apCAM-  
15 cytoskeletal linkages is regulated by Src family tyrosine kinase activity. *J Cell Biol*  
16 155:427-438.  
17  
18 Suter DM, Schaefer AW, Forscher P. 2004. Microtubule dynamics are necessary for SRC family  
19 kinase-dependent growth cone steering. *Curr Biol* 14:1194-1199.  
20  
21 Tanaka E, Kirschner MW. 1995. The role of microtubules in growth cone turning at substrate  
22 boundaries. *J Cell Biol* 128:127-137.  
23  
24 Tanaka E, Sabry J. 1995. Making the connection: cytoskeletal rearrangements during growth  
25 cone guidance. *Cell* 83:171-176.  
26  
27 Tanaka EM, Kirschner MW. 1991. Microtubule behavior in the growth cones of living neurons  
28 during axon elongation. *J Cell Biol* 115:345-363.  
29  
30 Turney SG, Bridgman PC. 2005. Laminin stimulates and guides axonal outgrowth via growth  
31 cone myosin II activity. *Nat Neurosci* 8:717-719.  
32  
33 Walker RA, O'Brien ET, Pryer NK, Soboeiro MF, Voter WA, Erickson HP, Salmon ED. 1988.  
34 Dynamic instability of individual microtubules analyzed by video light microscopy: rate  
35 constants and transition frequencies. *J Cell Biol* 107:1437-1448.  
36  
37 Waterman-Storer CM, Desai A, Bulinski JC, Salmon ED. 1998. Fluorescent speckle microscopy,  
38 a method to visualize the dynamics of protein assemblies in living cells. *Curr Biol*  
39 8:1227-1230.  
40  
41 Waterman-Storer CM, Salmon ED. 1997. Actomyosin-based retrograde flow of microtubules in  
42 the lamella of migrating epithelial cells influences microtubule dynamic instability and  
43 turnover and is associated with microtubule breakage and treadmilling. *J Cell Biol*  
44 139:417-434.  
45  
46 Williamson T, Gordon-Weeks PR, Schachner M, Taylor J. 1996. Microtubule reorganization is  
47 obligatory for growth cone turning. *Proc Natl Acad Sci U S A* 93:15221-15226.  
48  
49 Yamada KM, Spooner BS, Wessells NK. 1970. Axon growth: roles of microfilaments and  
50 microtubules. *Proc Natl Acad Sci U S A* 66:1206-1212.  
51  
52 Zhang XF, Schaefer AW, Burnette DT, Schoonderwoert VT, Forscher P. 2003. Rho-dependent  
53 contractile responses in the neuronal growth cone are independent of classical peripheral  
54 retrograde actin flow. *Neuron* 40:931-944.  
55  
56 Zhou FQ, Cohan CS. 2004. How actin filaments and microtubules steer growth cones to their  
57 targets. *J Neurobiol* 58:84-91.  
58  
59  
60

- 1  
2  
3 Zhou FQ, Waterman-Storer CM, Cohan CS. 2002. Focal loss of actin bundles causes  
4 microtubule redistribution and growth cone turning. *J Cell Biol* 157:839-849.  
5  
6 Zhou FQ, Zhou J, Dedhar S, Wu YH, Snider WD. 2004. NGF-induced axon growth is mediated  
7 by localized inactivation of GSK-3beta and functions of the microtubule plus end binding  
8 protein APC. *Neuron* 42:897-912.  
9  
10  
11  
12  
13  
14  
15  
16  
17  
18  
19  
20  
21  
22  
23  
24  
25  
26  
27  
28  
29  
30  
31  
32  
33  
34  
35  
36  
37  
38  
39  
40  
41  
42  
43  
44  
45  
46  
47  
48  
49  
50  
51  
52  
53  
54  
55  
56  
57  
58  
59  
60

For Peer Review

**FIGURE LEGENDS****Fig. 1. Regional differences in microtubule translocation dynamics in steady state growth cones**

(A) DIC image of a live *Aplysia* growth cone including P domain, T zone and C domain. Scale bar: 20  $\mu\text{m}$ . (B) Microtubules (MT) labeled by rhodamine-tubulin explore the P domain more in side than center segments. P domains were divided into 20 segments. Dashed line marks 75% of the distance from C domain boundary to the leading edge. (C) F-actin structures including filopodial bundles visualized with Alexa 488-phalloidin. (D) Quantification of microtubule exploration in distal segments: average values  $\pm$  s.e.m. of the sum of binarized microtubule signal beyond the 75% line (n=16 growth cones). (E) Retrograde actin flow rate was similar in all segments (mean values  $\pm$  s.e.m.; n=10). (F-I) Microtubule polymerization and translocation dynamics in side quadrants (n=36 microtubules) and center quadrants (n=34 microtubules). Data was averaged per growth cone and then mean values were determined from n=16 growth cones. (F) Whisker plots of microtubule polymerization and depolymerization rates. The top and lower ends of the boxes are the upper and lower quartiles; the middle line is the median value. Whiskers are minimum and maximum values. Means  $\pm$  s.e.m. are dots with error bars; mean values ( $\mu\text{m}/\text{minute}$ ) are above x-axis. Paired t-test (side versus center): P=0.15 (polymerization rate), P=0.45 (depolymerization rate). (G) Whisker plots of forward (P=0.24) and retrograde (P=0.01) translocation rates. (H) Percentage of time spent in polymerization, polymerization pauses, or depolymerization (Mean values  $\pm$  s.e.m.; P > 0.05). (I) Percentage of time spent in forward, translocation pauses, or retrograde translocation. Asterisks indicate P<0.005.

**Fig. 2. Preferential microtubule exploration of apCAM sites during latency period**

(A) DIC image of growth cone directly after placement of apCAM-bead (time = 0 minute) restrained with a micropipette. (B) Microtubule FSM image of (A). Dashed circle represents bead position; box marks region used for time-lapse montage in (D). (C) Actin FSM image of (A). On-axis and off-axis boxes were used for time-lapse montage in (G). (D) DIC and microtubule time-lapse montages of **on-axis** corridor marked in (B) before bead placement, during latency and **traction period**. Individual microtubules explored the adhesion site during the latency period. (E) Microtubule intensity past the 75% boundary in the P domain increased on-axis (one bead diameter) during the latency period and remained constant off-axis (up to 2 bead diameters next to the bead; mean values  $\pm$  s.e.m.; n=10 growth cones). (F) Retrograde actin flow rates remained similar in the latency period, but decreased significantly on-axis **during the traction period** (mean values  $\pm$  s.e.m.; n=7 growth cones). Latency period was equally divided into early, mid and late latency. (G) Montages of F-actin bundles in on-axis and off-axis boxes indicated in (C). line 1: 5.1  $\mu\text{m}/\text{minute}$ ; line 2: 4.9  $\mu\text{m}/\text{minute}$ ; line 3: 5.1  $\mu\text{m}/\text{minute}$ ; line 4: 4.8  $\mu\text{m}/\text{minute}$ ; line 5: 1.6  $\mu\text{m}/\text{minute}$ ; line 6: 12.7  $\mu\text{m}/\text{minute}$ ; line 1' to 7': 4.9 - 6.1  $\mu\text{m}/\text{minute}$ . Scale bars: 20  $\mu\text{m}$  (A), 10  $\mu\text{m}$  (D).

**Fig. 3. Microtubule and actin dynamics before and after bead placement**

Montages of individual microtubules (top) and actin bundles (bottom) in the on-axis region before bead placement (A) and during the latency phase (B). The growth cone leading edge is facing the top edge. For translocation analysis, an internal reference speckle was followed (green

1  
2  
3 line: forward; yellow: translocation pause; magenta: retrograde). Internal actin speckles used for  
4 line tracing are shown in orange. Polymerization events were determined by the  
5 addition/disappearance of microtubule plus end speckles, and polymerization rates measured  
6 based on the distance between the tip and internal reference speckle per time interval.  
7  
8 Microtubules are color-shaded based on polymerization event (green: polymerization; yellow:  
9 polymerization pause; magenta: depolymerization). Arrows indicate direction of retrograde flow.  
10  
11 Time-lapse interval: 10 seconds. Vertical distance indicated on the right. (A) Example of an on-  
12 axis microtubule before bead placement undergoing plus-end polymerization and retrograde  
13 translocation (magenta lines) followed by depolymerization. (B) Example of an on-axis  
14 microtubule during the latency period spending more time in translocation pause (yellow lines).

15  
16  
17  
18  
19  
20  
21  
22  
23  
24  
25  
26  
27  
28  
29  
30 **Fig. 4. Quantification of microtubule polymerization and translocation dynamics during**  
31 **the latency period**

32  
33  
34  
35 (A) Schematic of P domain areas from which microtubules were selected for analysis: Side  
36 quadrants before (pre-bead off-axis) and after bead placement (latency off-axis); **C domain-bead**  
37 **axis** before (pre-bead on-axis) and after bead placement (latency on-axis). Only clearly  
38 quantifiable microtubules were analyzed in 10 growth cones (42 microtubules on-axis, 33  
39 microtubules off-axis). (B) Polymerization rates do not change during the latency period (paired  
40 t-test for pre-bead versus latency:  $P > 0.05$ ). Data are shown as whisker plots. (C) Forward and  
41 retrograde translocation rates as whisker plots ( $P > 0.05$ ). (D) During the latency phase, on-axis  
42 microtubules spent less time in depolymerization and conversely more time in pause when  
43 compared to on-axis microtubules before bead placement. (E) Exploratory on-axis microtubules  
44 spent less time in retrograde translocation and conversely more time in translocation pause  
45  
46  
47  
48  
49  
50  
51  
52  
53  
54  
55  
56  
57  
58  
59  
60

1  
2  
3 during the latency period than prior to bead placement. Mean values  $\pm$  s.e.m. are shown in (D)  
4  
5 and (E); asterisks indicate  $P < 0.05$ .  
6  
7  
8  
9

### 10 **Fig. 5. Microtubules and F-actin rearrange in concert during the *traction* period**

11  
12 (A) Time-lapse montage of actin (upper panel) and microtubule dynamics (lower panel) in the **C**  
13 **domain-bead axis** during the late latency and **traction** period. Dashed line: growth cone leading  
14 edge; circle: apCAM bead position. Actin speckles colored in pink and orange show that  
15 retrograde flow continued during late latency and abruptly stopped at the onset of **traction** phase.  
16 Red line: forward shift of the T zone. Blue and green microtubules explored the bead since the  
17 late latency period, while red microtubules **extended to the bead during the traction period**. White  
18 line: translocation pause of blue microtubule. Scale bar: 5  $\mu\text{m}$ . (B) DIC image of a different  
19 growth cone **when the C domain reached the bead**. Line scans 1 and 2 through the T zone were  
20 used for actin and microtubule kymographs on the right (green: actin, red: microtubules; see also  
21 Movie 4). Green box demarks area used for tracking the speckle positions shown in (C). All  
22 scale bars: 10  $\mu\text{m}$ . (C) Tracking of 3 pairs of adjacent actin and microtubule speckles from boxed  
23 area in (B) in the **traction** period. Arrows indicate direction of speckle movements.  
24  
25  
26  
27  
28  
29  
30  
31  
32  
33  
34  
35  
36  
37  
38  
39  
40  
41  
42  
43  
44  
45  
46  
47  
48  
49  
50  
51  
52  
53  
54  
55  
56  
57  
58  
59  
60

### 44 **Fig. 6. Model: Mechanisms of microtubule extension during adhesion-mediated growth** 45 **cone guidance**

46  
47 Upper panel shows top view of growth cone in *steady state*, *latency* and **traction** period of  
48 adhesion-mediated growth cone **guidance**. Lower panel shows corresponding sections of the  
49 plasma membrane/cytoskeleton interface marked by the box in the top view. In *steady state*  
50 growth cones **on poly-lysine**, apCAM is not coupled to actin (1), which moves at constant  
51  
52  
53  
54  
55  
56  
57  
58  
59  
60

1  
2  
3 retrograde flow (2). Microtubule tip positions are determined by a balance of plus-end  
4 polymerization and retrograde transport through actin flow coupling via putative linker protein(s)  
5 (blue) (3). During the *latency period*, apCAM-actin coupling forces are weak (1) and therefore  
6 do not result in flow attenuation (2). Putative signals derived from the adhesion site might  
7 uncouple microtubules from F-actin by changing the affinity of linker protein(s) to at least one of  
8 the cytoskeletal components (3), resulting in higher microtubule exploration of the adhesion site.  
9 Note that the additional possible mechanisms discussed such as increased microtubule stability  
10 and capture at adhesion site are not depicted in this schematic. During the *traction period*, strong  
11 apCAM-actin coupling (1) stops retrograde flow along the **C domain-bead** axis (2). Microtubules  
12 persisting at the bead since the latency phase are joined by new microtubules invading the  
13 corridor due to actin flow attenuation and F-actin clearance (3). T zone and C domain  
14 microtubules translocate towards the bead, potentially by coupling to arcs and central actin  
15 bundles.  
16  
17  
18  
19  
20  
21  
22  
23  
24  
25  
26  
27  
28  
29  
30  
31  
32  
33  
34  
35  
36  
37  
38  
39  
40  
41  
42  
43  
44  
45  
46  
47  
48  
49  
50  
51  
52  
53  
54  
55  
56  
57  
58  
59  
60



**SUPPLEMENTAL MATERIAL**

**Movie 1.** Microtubules explore side more than center regions in steady state *Aplysia* growth cones. Growth cone periphery was divided into 20 segments (green: side segments; blue: center segments). Segments cover the distal P domain from the 75% line to the leading edge. Time interval: 10 seconds; elapsed time: 5 minutes; playback time: 60x real time (6 fps). Scale bar: 10  $\mu\text{m}$ .

**Movie 2.** Triple channel (DIC, microtubule and actin FSM) time-lapse movie of **growth cone response** to apCAM-coated bead. Elapsed time 0-5 minutes: before bead placement; 14-28 minutes: latency period; 29-32 minutes: **traction** period; 32-33 minutes: bead release. Time interval: 10 seconds; elapsed time: 33 minutes; playback time: 60x real time (6 fps). Scale bar: 10  $\mu\text{m}$ .

**Movie 3.** Dual channel (DIC, microtubule FSM) time-lapse movie showing early exploratory microtubules (colored in blue) extending towards apCAM-bead adhesion site during the latency period. Elapsed time -6:57-0:00 minutes:seconds: before bead placement; 0:00-5:27 minutes:seconds: latency period; 5:27-7:57 minutes:seconds: **traction** period. Time interval: 10 seconds; elapsed time: 15 minutes; playback time: 50x real time (5 fps). **Scale bar: 5  $\mu\text{m}$ .**

**Movie 4.** Triple channel (DIC, microtubule and actin FSM) time-lapse movie of **structural and cytoskeletal rearrangements during the traction phase**. Movie shows concomitant movement of

1  
2  
3 microtubules with actin arcs and bundles in the T zone and C domain, respectively, towards  
4 apCAM bead. Microtubules and actin reference speckles are traced in the T zone (orange and  
5  
6 yellow arrowheads) and C domain (red and pink arrowheads). Time interval: 10 seconds; elapsed  
7  
8  
9  
10 time: 5 minutes; playback time: 150x real time (15 fps). Scale bar: 10  $\mu$ m.  
11  
12  
13  
14  
15  
16  
17  
18  
19  
20  
21  
22  
23  
24  
25  
26  
27  
28  
29  
30  
31  
32  
33  
34  
35  
36  
37  
38  
39  
40  
41  
42  
43  
44  
45  
46  
47  
48  
49  
50  
51  
52  
53  
54  
55  
56  
57  
58  
59  
60

For Peer Review

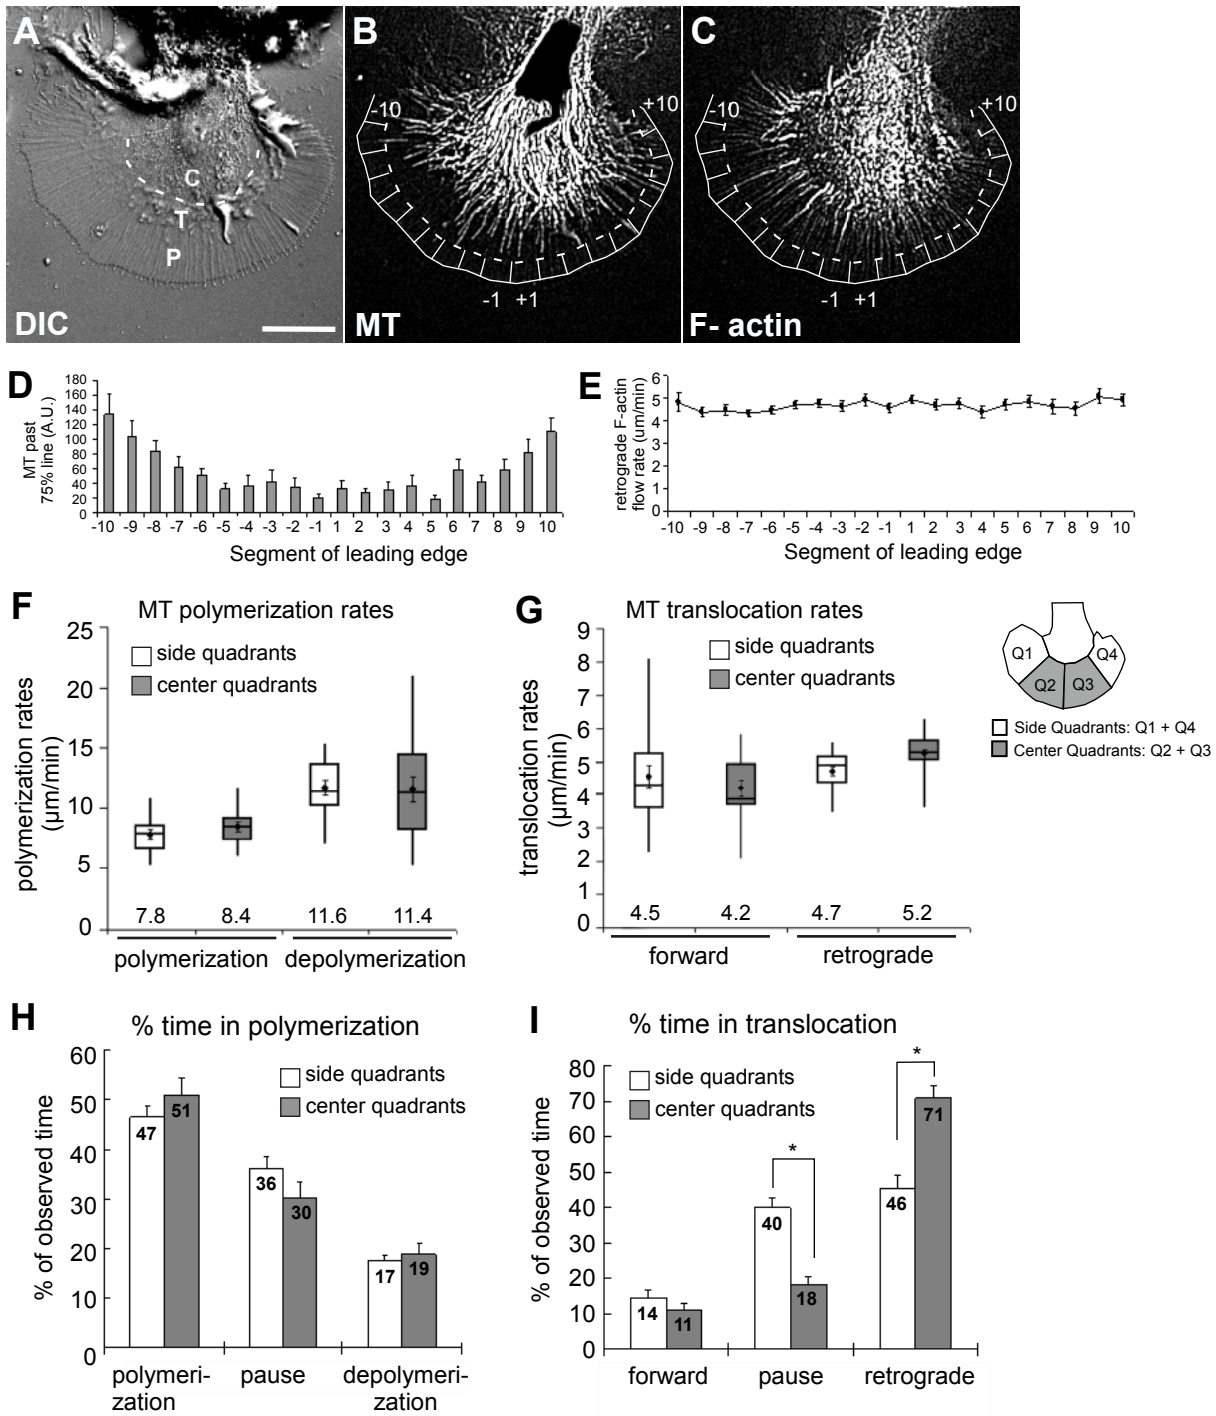

Figure 1; Lee and Suter

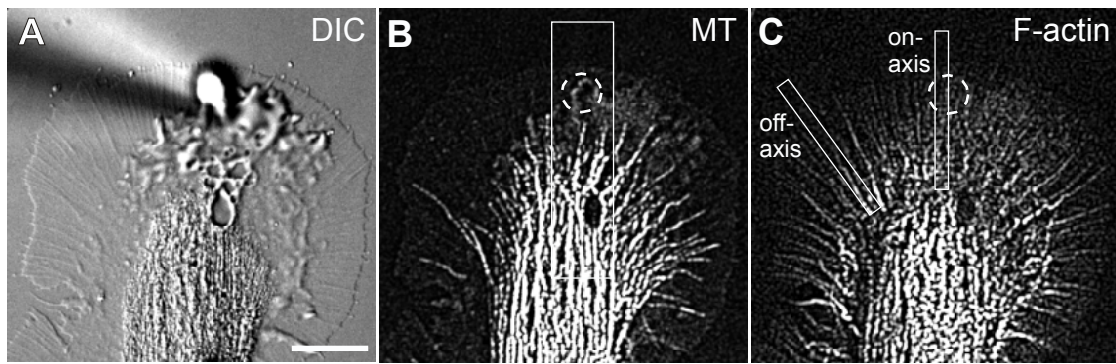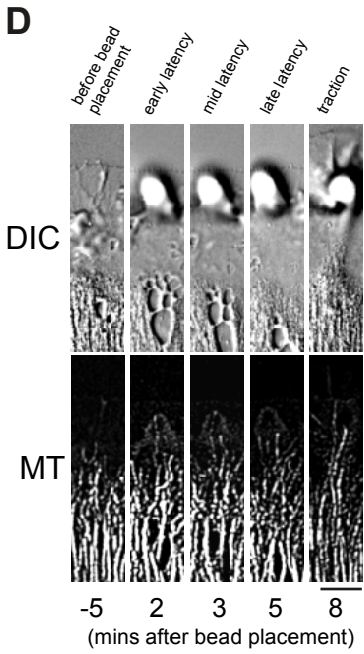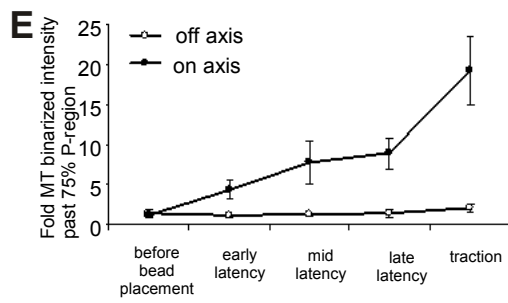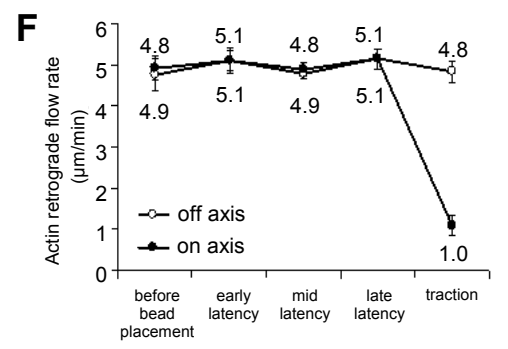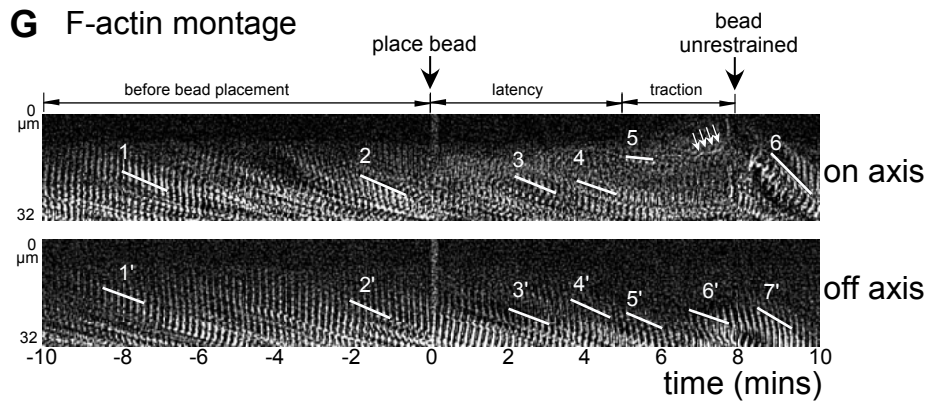

Figure 2; Lee and Suter



**A** Montage of on-axis microtubule (top) and actin (bottom) before bead placement

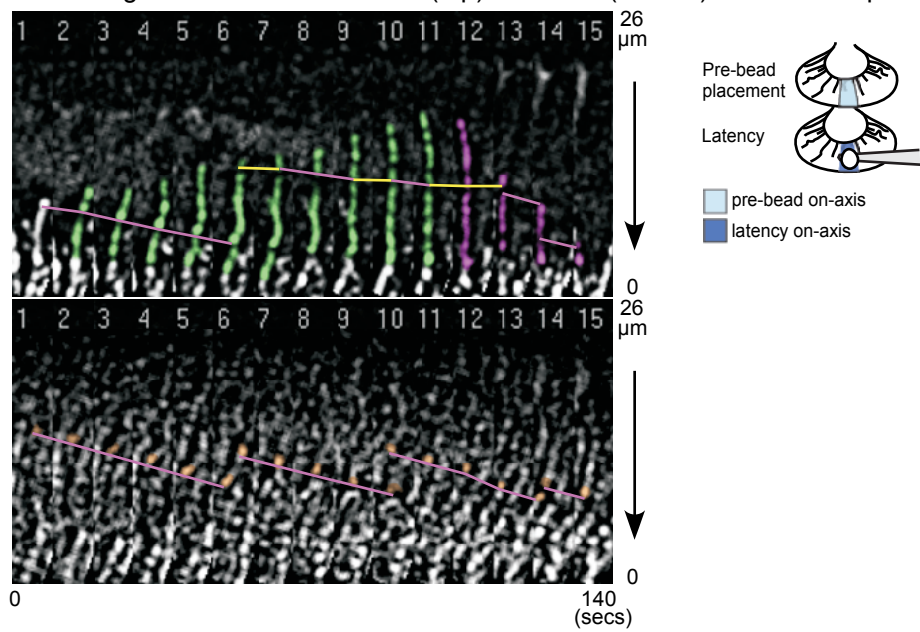

**B** Montage of on-axis microtubule (top) and actin (bottom) during latency

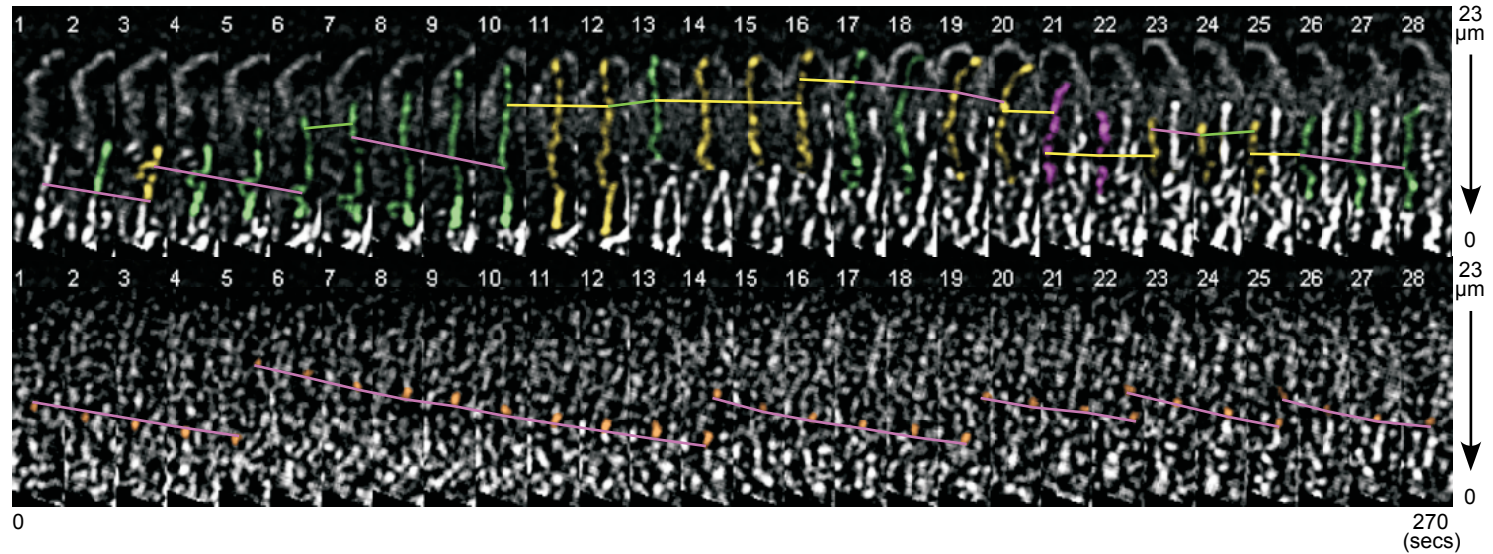

Figure 3; Lee and Suter

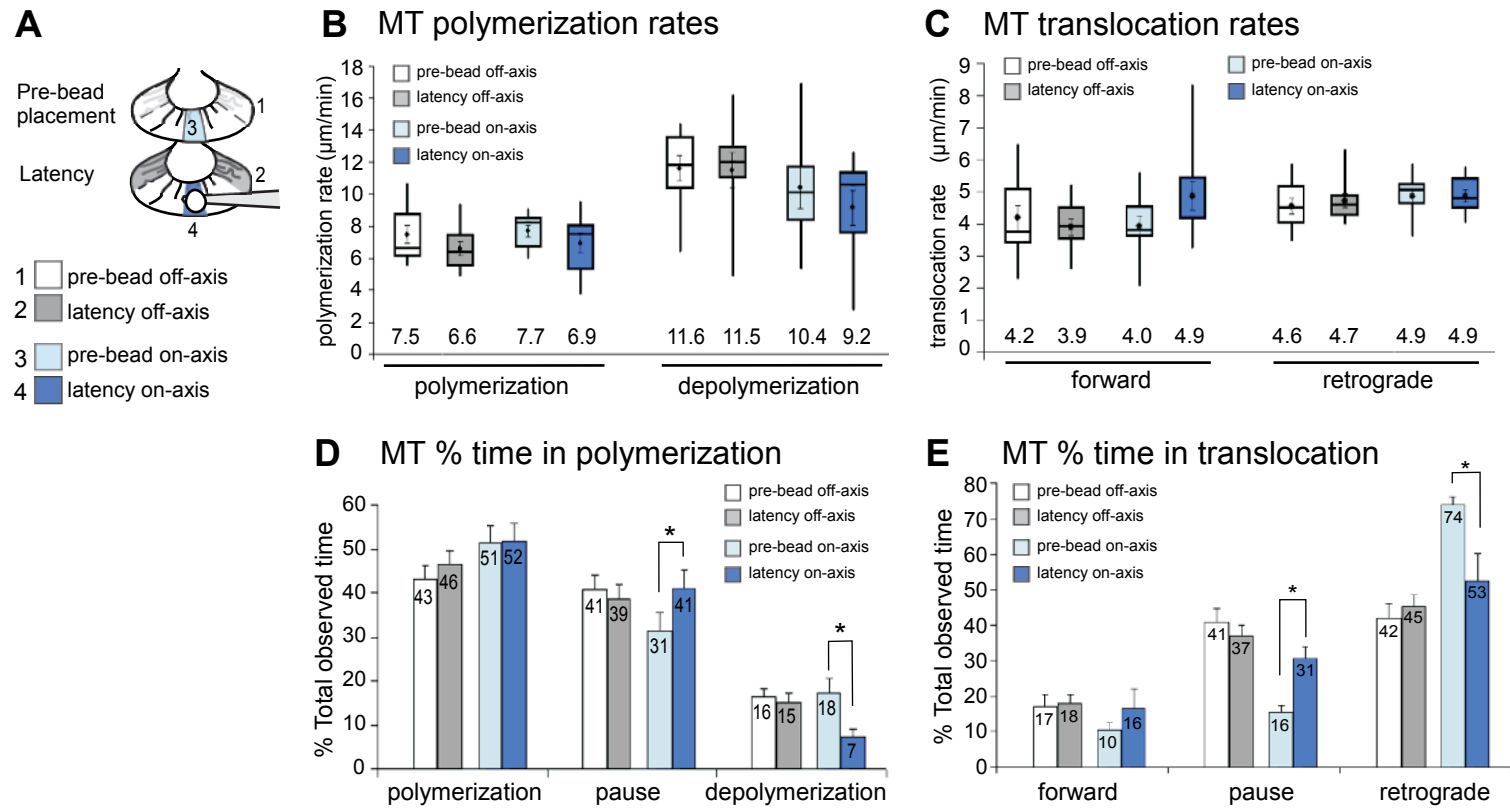

Figure 4; Lee and Suter



### Steady state

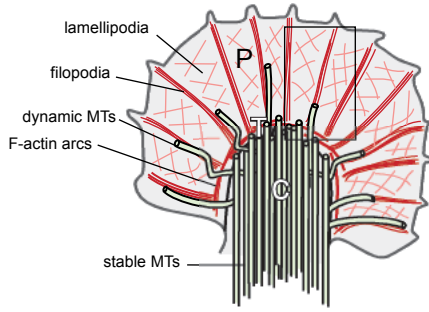

### Latency period

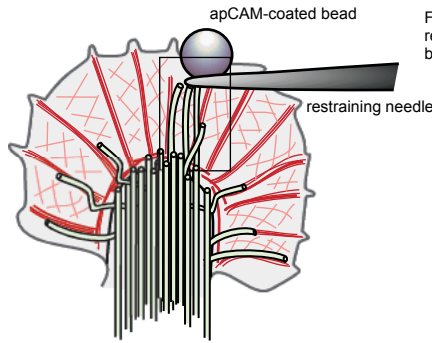

### Traction period

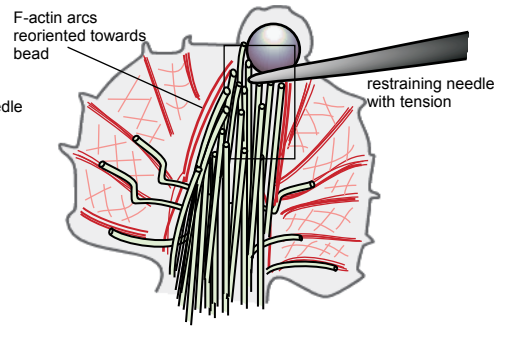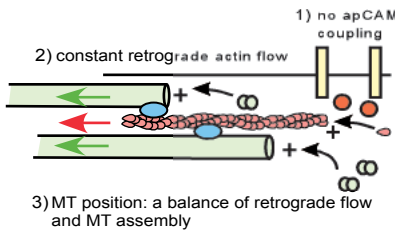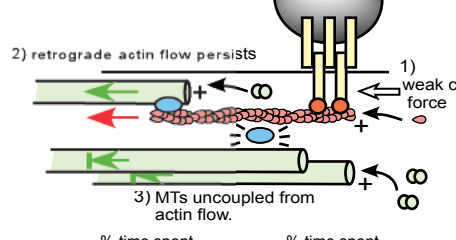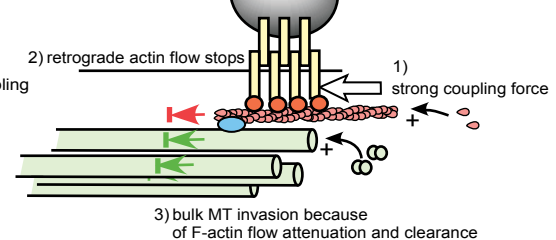

% time spent polymerization -  
pause ↑  
depolymerization ↓

% time spent translocation forward -  
pause ↑  
retrograde ↓

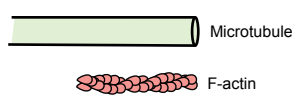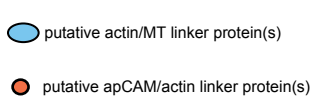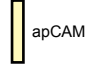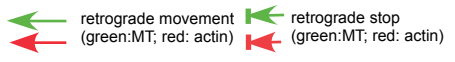

Figure 6; Lee and Suter
